# Supplementary material for: Conformational and Structural Changes in Chickpea Proteins Caused by Simulated Salivary Alterations in the Elderly
Source: MDPI journal article supplement (doi:10.3390/foods12193668), 2023-10-05
Supplement: s1 [file s1]

## Supplementary material

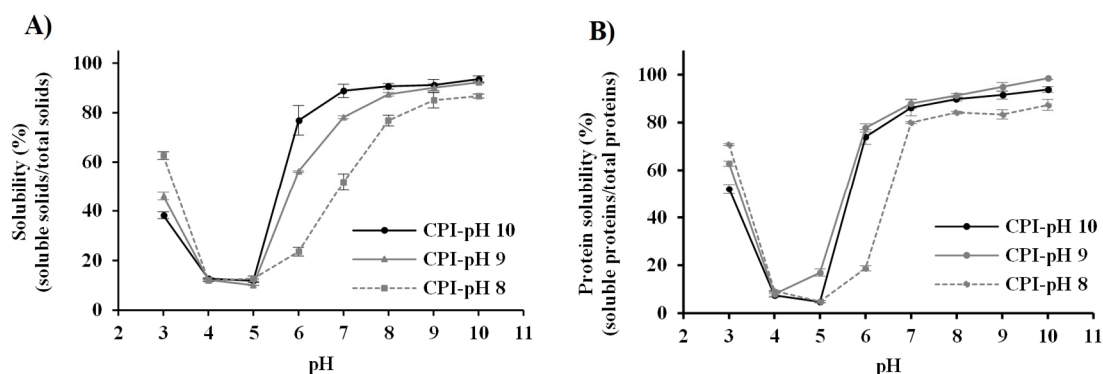

**Figure S1.** (A) Solubility (% g soluble solids/g total solids x100) and (B) protein solubility (% g soluble proteins/g total proteins x100) as a function of pH for CPI obtained at three different alkaline extraction pH values (8.0, 9.0, and 10.0). Data are shown as mean  $\pm$  SD (n=3).

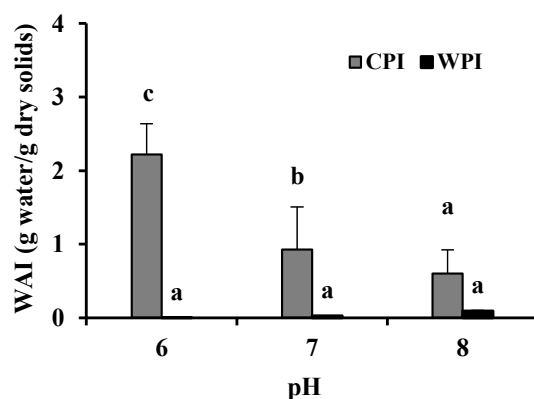

**Figure S2.** Water absorption index (WAI) (g water/g dry solids) over three pH of simulated salivary fluid values (6, 7, and 8) for CPI and WPI at 37°C. Data are shown as the mean  $\pm$  SD (n=3). Different letters on each bar of the same isolate indicate significant differences (p<0.05).

**Table S1.** Composition of simulated oral fluid made up to 400 mL and adult (-A) and elderly (-EL) conditions for *in vitro* oral processing.

| Compound                                          | Stock solutions<br>(g/L) | Volume to add from stock solution<br>(ml) |               |
|---------------------------------------------------|--------------------------|-------------------------------------------|---------------|
|                                                   |                          | Adult (-A)                                | Elderly (-EL) |
|                                                   |                          |                                           |               |
| Electrolytes:                                     |                          |                                           |               |
| KCl                                               | 37.3                     | 15.1                                      | 30.2          |
| KH <sub>2</sub> PO <sub>4</sub>                   | 68                       | 3.7                                       | 3.7           |
| NaHCO <sub>3</sub>                                | 84                       | 6.8                                       | 6.8           |
| NaCl                                              | 117                      | 0.6                                       | 0.6           |
| MgCl <sub>2</sub> (H <sub>2</sub> O) <sub>6</sub> | 30.5                     | 0.5                                       | 0.5           |
| (NH <sub>4</sub> ) <sub>2</sub> CO <sub>3</sub>   | 48                       | 0.06                                      | 0.06          |
| Conditions for simulated oral processing:         |                          |                                           |               |

|                                                   |      |       |       |
|---------------------------------------------------|------|-------|-------|
| CaCl <sub>2</sub> (H <sub>2</sub> O) <sub>2</sub> | 44.1 | 0.025 | 0.025 |
| α-amylase [U/mL]                                  |      | 75    | 150   |
| pH                                                |      | 7     | 8     |

**Table S2.** Proximate analysis and amino acid content (g/100 g protein) of chickpea protein isolate (CPI) and whey protein isolate (WPI) (% , dry basis)

| Parameters                             | CPI         | WPI         |
|----------------------------------------|-------------|-------------|
| Protein (Nx6.25)                       | 88.5        | 92.0        |
| Lipid                                  | 2.6         | <0.4        |
| Ash                                    | 5.6         | 2.5         |
| NNE                                    | 3.0         | 5.0         |
| Moisture (% , wet basis)               | 5.0         | 7.8         |
| <i>Essential amino acids (EA)</i>      |             |             |
| Leucine (Leu)                          | 5.8         | 8.3         |
| Isoleucine (Ile)                       | 3.1         | 3.6         |
| Valine (Val)                           | 3.0         | 3.2         |
| Cysteine (Cys)                         | 2.5         | 7.6         |
| Methionine (Met)                       | 1.0         | 1.5         |
| Phenylalanine (Phe)                    | 4.2         | 2.2         |
| Threonine (Thr)                        | 3.1         | 4.2         |
| Tyrosine (Tyr)                         | 1.6         | 2.2         |
| Lysine (Lys)                           | 5.8         | 6.4         |
| Histidine (His)                        | 1.9         | 1.5         |
| <b>Total EA (TEA)</b>                  | <b>32.1</b> | <b>40.9</b> |
| <i>Non-essential amino acids (NEA)</i> |             |             |
| Glycine (Gly)                          | 3.6         | 1.5         |
| Alanine (Ala)                          | 3.6         | 5.2         |
| Proline (Pro)                          | 4.7         | 4.5         |
| Serine (Ser)                           | 5.2         | 3.5         |
| Arginine (Arg)                         | 8.9         | 1.4         |
| Aspartic acid (Asp)                    | 10.9        | 10.0        |
| Glutamic acid (Glu)                    | 16.4        | 18.4        |
| <b>Total NEA</b>                       | <b>53.3</b> | <b>44.6</b> |
| <b>Total amino acids (TAA)</b>         | <b>85.4</b> | <b>85.4</b> |
| <i>Ratio TEA: TAA</i>                  | <i>0.38</i> | <i>0.48</i> |
| <i>Ratio Met: Cys</i>                  | <i>0.40</i> | <i>0.20</i> |
| Total acidic AA, %                     | 32.0        | 33.3        |
| Total basic AA, %                      | 19.5        | 10.9        |
| Total hydrophobic AA, %                | 36.9        | 44.2        |
| Total non-polar AA, %                  | 11.6        | 11.6        |

NNE=non-nitrogen extract. Results (mean, n=3)

Based on their polarity and water binding nature the AAs were grouped as acidic (Asp, Glu), basic (Lys, His, and Arg), hydrophobic (Leu, Ile, Val, Cys, Met, Phe, Gly, Ala, and Pro), and uncharged polar (Thr, Tyr, and Ser).
